# Supplementary material for: Enhanced Catalytic Hydrogenation of Olefins in Sulfur-Rich Naphtha Using Molybdenum Carbide Supported on γ-Al2O3 Spheres under Steam Conditions: Simulating the Hot Separator Stream Process
Source: MDPI journal article supplement (doi:10.3390/ma17102278), 2024-05-11
Supplement: s1 [file s1]

## **Appendix A. Supplementary data**

### **Enhanced Catalytic Hydrogenation of Olefins in Sulfur-rich Naphtha Using Molybdenum Carbide Supported on $\gamma$ -Al<sub>2</sub>O<sub>3</sub> Spheres under Steam Conditions: Simulating the Hot Separator Stream Process**

Hadj Abbas Abbas<sup>1</sup>, Zahra Asgar Pour<sup>2\*</sup>, Mohammed S. Alnafisah<sup>3</sup>, Pablo Gonzalez Cortes<sup>4,5</sup>, Mustapha El Hariri El Nokab<sup>6</sup>, Ahmed Elshewy<sup>7</sup>, Khaled O. Sebakhy<sup>8,9\*</sup>

<sup>1</sup> Laboratoire de géologie du Sahara, Université Kasdi Merbah Ouargla, Ouargla, Algeria.

<sup>2\*</sup> Research and Development Department, Kisuma chemicals, Billitonweg 7, 9641 KZ Veendam, The Netherlands.

<sup>3</sup> King Abdulaziz City for Science and Technology (KACST), Riyadh 12354, Saudi Arabia.

<sup>4</sup> Engineering and Technology Institute Groningen (ENTEG), University of Groningen, Nijenborgh 4, 9747 AG Groningen, The Netherlands.

<sup>5</sup> Laboratorio de Nanocelulosa y Biomateriales, Departamento de Ingeniería Química, Biotecnología y Materiales, Facultad de Ciencias Físicas y Matemáticas, Universidad de Chile, Avenida Beauchef 851, Santiago, Chile 8330111.

<sup>6</sup> Department of Chemistry, Michigan State University, East Lansing, MI 48824, USA.

<sup>7</sup> Department of Pharmaceutical Organic Chemistry, Faculty of Pharmacy, Cairo University, 11562 Cairo, Egypt.

<sup>8\*</sup> Laboratory for Chemical Technology (LCT), Department of Materials, Textiles and Chemical Engineering, Ghent University, Technologiepark 125, 9052 Ghent, Belgium.

<sup>9\*</sup> Department of Chemical and Petroleum Engineering, University of Calgary, Calgary, Alberta, Canada T2N 1N4.

## Appendix A. Supplementary data

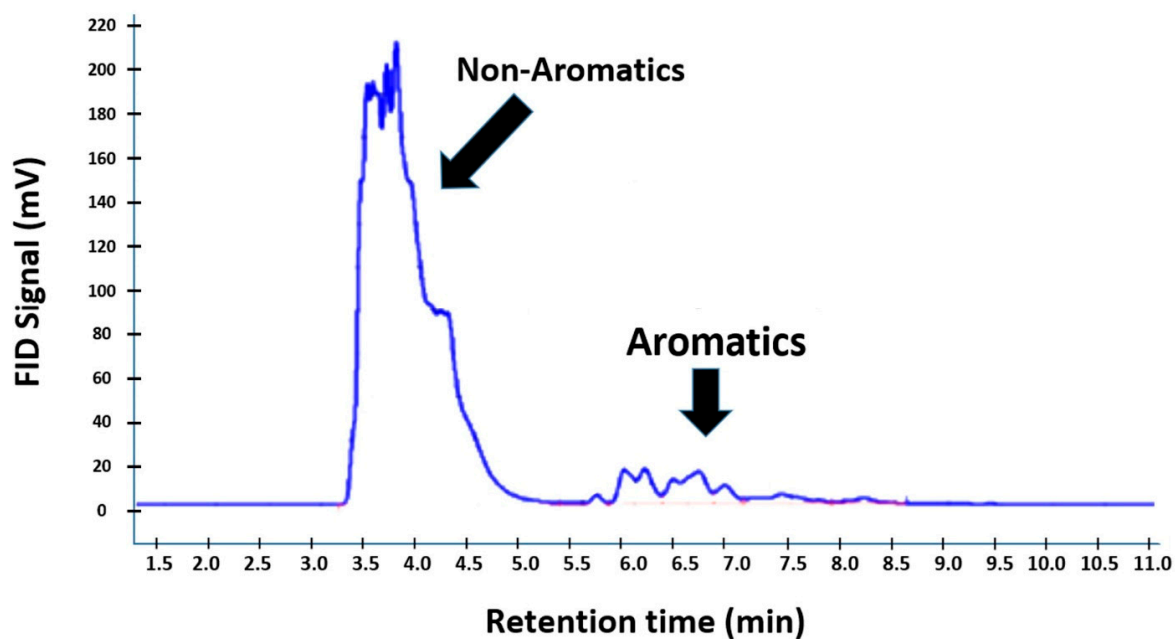

**Figure S1.** Normalized SFC chromatogram for Nexen naphtha feedstock using ASTM D-5186 method.

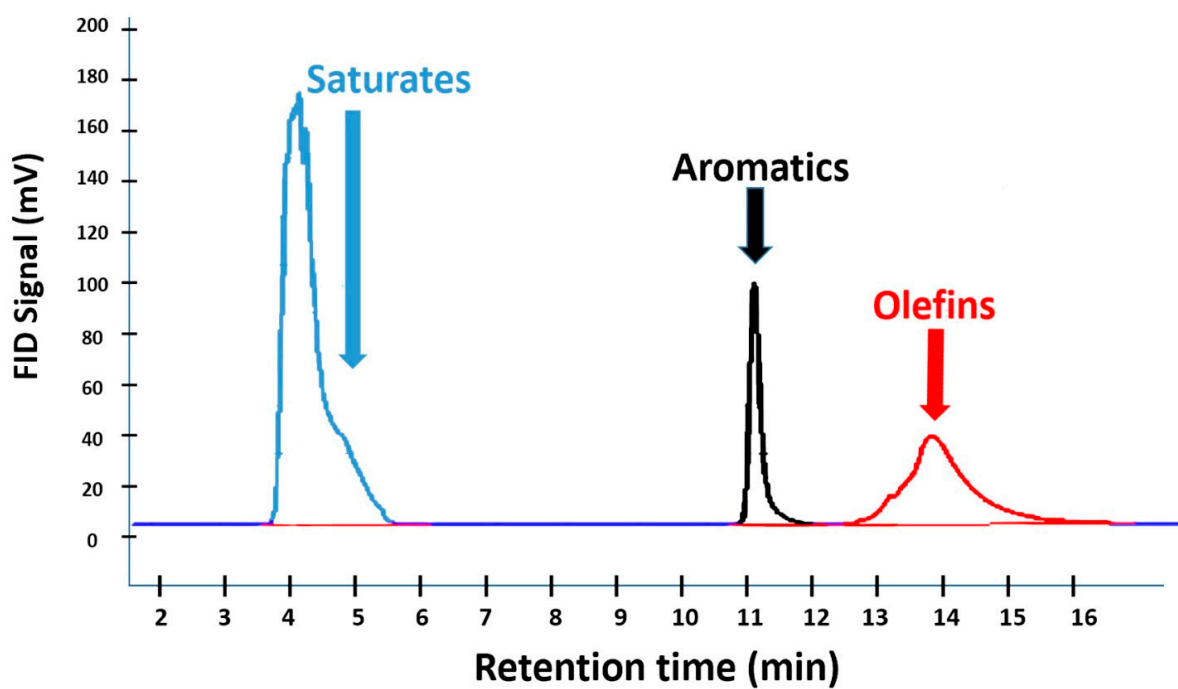

**Figure S2.** Normalized SFC chromatogram for Nexen naphtha feedstock using ASTM D-6550 method.

## Appendix A. Supplementary data

**Table S1.** Olefinic molecules present in Nexen naphtha, as determined by GC-MS-FID (ASTM D-5134).

|                        |                           |                              |
|------------------------|---------------------------|------------------------------|
| 2-methyl, 1-propene    | 2-hexene (Z)              | 2-heptene (Z)                |
| 1-butene (Z)           | 3-methyl, 2-pentene (E)   | 1,2,3-trimethyl cyclopentene |
| 2-butene (Z)           | 2,4-dimethyl-1-pentene    | 2-ethyl cyclopentene         |
| 2-methyl, 1-butene     | 1-methyl cyclopentene     | 4-methyl-3-heptene           |
| 1-pentene              | 3-methyl, 1-hexene        | 1,2,3-trimethyl cyclopentene |
| 2-methyl, 1-butene     | 2,4-dimethyl-2-pentene    | 5-methyl-3-heptene           |
| 2-pentene (E)          | 2-methyl-3-hexene         | 1-methyl cyclohexene         |
| 2-pentene (Z)          | 4-methyl-1-hexene         | 6-methyl-2-heptene           |
| 2-methyl, 2-butene     | 4-methyl-2-hexene         | 6-methyl-2-heptene           |
| Cyclopentene           | Cyclohexene               | 2,5-dimethyl -2,4-hexadiene  |
| 4-methyl, 1-pentene    | 4,4-dimethyl-2-pentene    | 1-Octene                     |
| 3-methyl, 1-pentene    | 1-heptene                 | 1,2,3-trimethyl cyclopentene |
| 2,3 dimethyl-butene    | 3-methyl-3-hexene         | 4-Octene (E)                 |
| 2-methyl, 1-pentene    | 4,4-dimethyl cyclopentene | Methyl-ethyl cyclopentene    |
| 1-hexene               | 3-heptene                 | 3-Octene (E)                 |
| 3-hexene (E)           | 2-methyl, 2-hexene        | 2-Octene (E)                 |
| 3-hexene (Z)           | 3-methyl, 3-hexene (E)    | 1,2,3 trimethyl cyclopentene |
| 2-hexene (E)           | 2-heptene                 | 2-Octene (Z)                 |
| 4-methyl, 2-pentene    | 3,5-dimethyl cyclopentene | 2,6-dimethyl-3-heptene       |
| 3-methyl, cyclopentene | 3-methyl-2-hexene (Z)     | 1-methyl-thio-1-butene       |
| 3-methyl, 2-pentene    |                           | 2-ethyl cyclohexene          |
| 3-methyl cyclopentene  |                           | 1-ethyl cyclohexene          |
|                        |                           | 2,6-dimethyl-2-heptene       |
|                        |                           | 1-Nonene                     |
|                        |                           | 2-Nonene                     |
|                        |                           | 3-Nonene                     |
|                        |                           | 5-Nonene                     |
|                        |                           | 4-Nonene                     |
|                        |                           | 4-Decene                     |
|                        |                           | 1-methyl-2-decene            |
|                        |                           | 2-methyl-3-decene            |

36

## References

- (1) Badoni, R. P.; Bhagat, S. D.; Joshi, G. C. Analysis of olefinic hydrocarbons in cracked petroleum stocks: a review. *Fuel* **1992**, *71*(5), 483-491. [https://doi.org/10.1016/0016-2361\(92\)90144-D](https://doi.org/10.1016/0016-2361(92)90144-D).

## Appendix A. Supplementary data

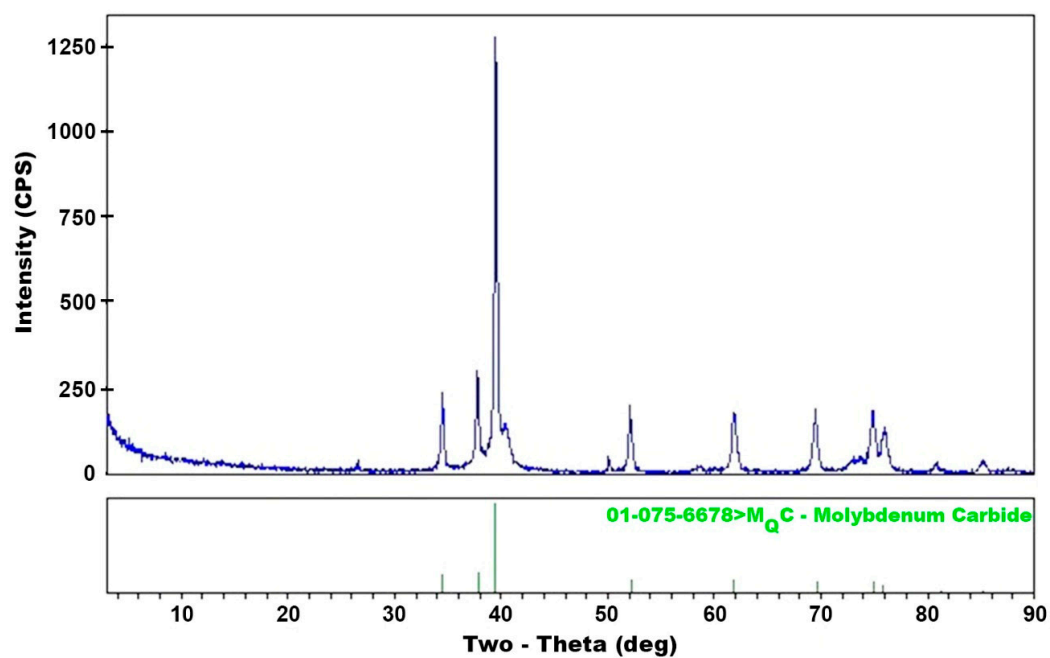

**Figure S3.** XRD diffractogram for the activated Mo<sub>2</sub>C prepared by the sucrose route.
